# Supplementary material for: An Optimized Workflow for the Discovery of New Antimicrobial Compounds Targeting Bacterial RNA Polymerase Complex Formation
Source: MDPI journal article supplement (doi:10.3390/antibiotics11101449), 2022-10-21
Supplement: s1 [file s1]

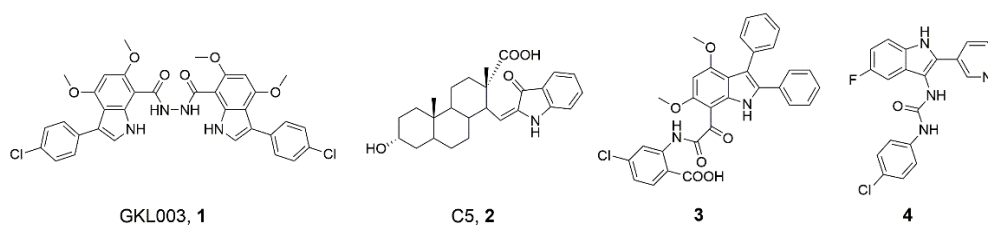

**Figure S1.** RNA polymerase  $\beta'$ - $\sigma^{70}$  PPI interaction inhibitors.

### 1. yBRET screening

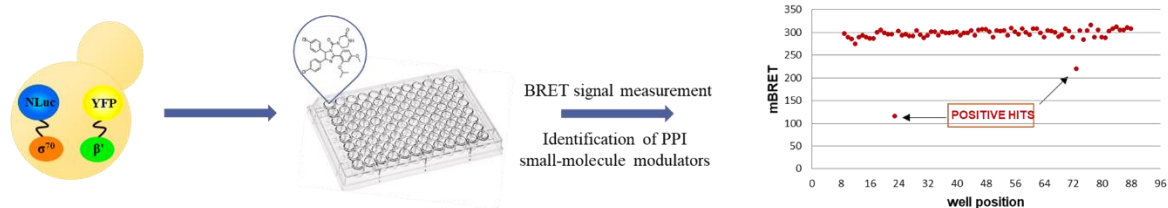

### 2. In vitro competitive ELISA

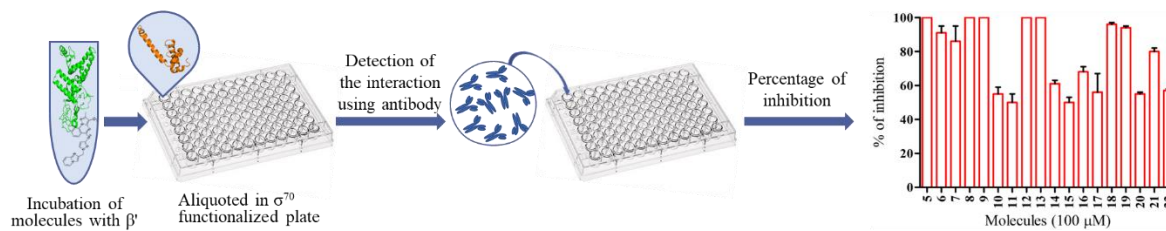

### 3. Bacterial growth inhibition assay

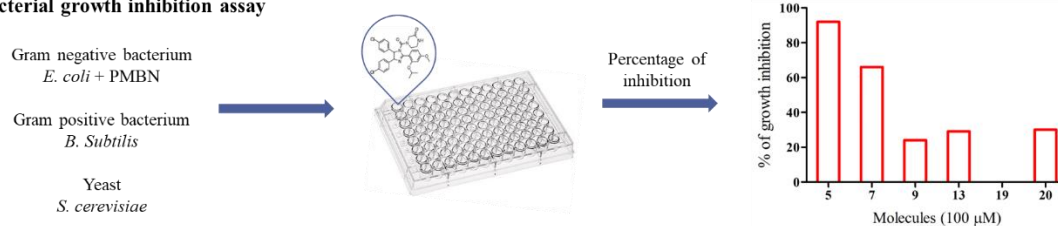

**Figure S2.** Visual scheme representing the drug-discovery workflow.

**Table S1.**  $\beta'$ - $\sigma^{70}$  binding inhibition of  $\gamma$ BRET-selected compounds measured through ELISA assay performed at a fixed concentration of 100  $\mu$ M. Data are the mean of three replicates; SD is reported.

| Library | Molecule | Structure                                                                            | ELISA 100 $\mu$ M |
|---------|----------|--------------------------------------------------------------------------------------|-------------------|
| ReCC    | 5        | 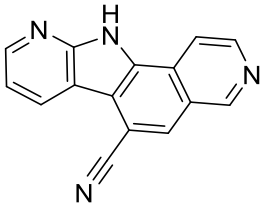    | 100               |
|         | 6        |     | 91 $\pm$ 4        |
|         | 7        |     | 86 $\pm$ 9        |
|         | 8        |   | 100               |
| ICMBS   | 9        |  | 100               |
|         | 10       |  | 55 $\pm$ 4        |
|         | 11       |   | 50 $\pm$ 5        |

| Library | Molecule | Structure                                                                           | ELISA 100μM |
|---------|----------|-------------------------------------------------------------------------------------|-------------|
|         | 12       | 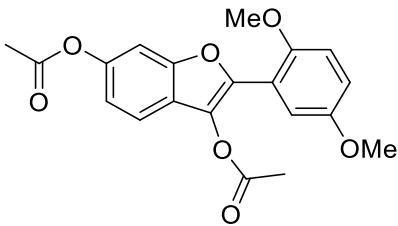   | 100         |
|         | 13       |    | 100         |
|         | 14       |   | 61±2        |
| PKRC    | 15       |   | 50±3        |
|         | 16       |  | 68±3        |
|         | 17       |  | 56±11       |
|         | 18       |  | 96±1        |

| Library | Molecule | Structure                                                                            | ELISA 100μM |
|---------|----------|--------------------------------------------------------------------------------------|-------------|
|         | 19       | 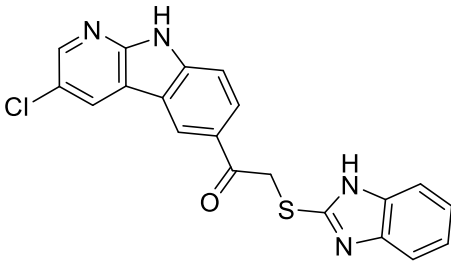   | 94±1        |
|         | 20       |    | 55±1        |
|         | 21       |    | 80±2        |
|         | 22       |  | 57±1        |
